# Supplementary material
Source: MDPI journal article supplement (https://www.mdpi.com/2076-3417/11/4/1422)
Supplement: s1 [file s1]

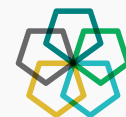

# Aromatic Plant Research Center

We provide uncompromising  
quality control for your products.

**Customer:** doTERRA International

**Lot Number:** 180783

**Date Filled:** 3/19/2018

**Column:** ZB5 (60 m length × 0.25 mm inner diameter × 0.25 µm film thickness)

**Instrument:** Shimadzu GCMS-QP2010 Ultra

**Carrier gas:** Helium 80 psi

**Temperature ramp:** 2 degrees celsius per minute up to 260-degrees celsius

**Split ratio:** 30:1

**Sample preparation:** 5%w/v solution with Dichloromethane.

**Comments:**

The analysis of this Oregano lot revealed no contaminants or adulteration.

The sample meets the expected chemical profile for authentic essential oils of *Origanum vulgare*.

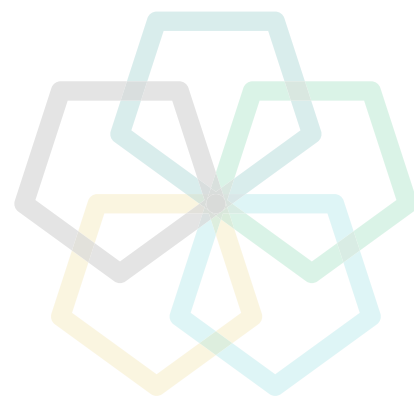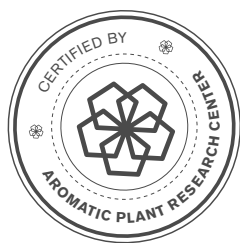

# Oregano Essential Oil

Customer: doTERRA International

Lot Number: 180783

Date Filled: 3/19/2018

## Chromatogram

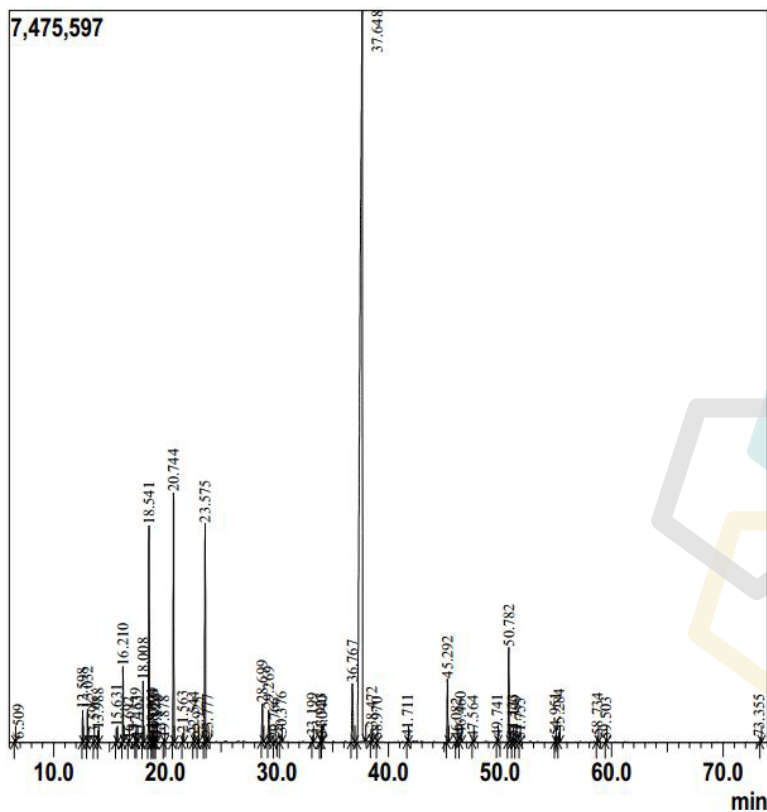

## Peak Report

| Ret.Time | Compound Name               | Area % | Ret.Time | Compound Name             | Area % | Ret.Time | Compound Name             | Area % |
|----------|-----------------------------|--------|----------|---------------------------|--------|----------|---------------------------|--------|
| 6.509    | Methyl-alpha-methyl-butrate | 0.04   | 23.575   | Linalool                  | 5.9    | 51.399   | delta-Cadinene            | 0.09   |
| 12.598   | alpha-Thujene               | 0.59   | 23.777   | Hotrienol                 | 0.18   | 51.755   | beta-Sesquiphellandrene   | 0.03   |
| 13.032   | alpha-Pinene                | 0.62   | 28.699   | Borneol                   | 1.2    | 54.951   | Spathulenol               | 0.17   |
| 13.596   | Thujadiene                  | 0.03   | 29.269   | Terpinen-4-ol             | 1.04   | 55.284   | Caryophyllene oxide       | 0.27   |
| 13.988   | Camphene                    | 0.23   | 29.766   | para-Cymen-8-ol           | 0.06   | 58.734   | epi-alpha-Cadinol         | 0.17   |
| 15.631   | Octen-3-ol                  | 0.37   | 30.376   | alpha-Terpineol           | 0.28   | 59.503   | alpha-Cadinol             | 0.06   |
| 16.21    | Myrcene                     | 1.54   | 33.199   | Carvacrol methyl ether    | 0.15   | 73.355   | Oregano Sesquiterpenoid 2 | 0.14   |
| 16.692   | 3-Octanol                   | 0.05   | 33.923   | Carvone                   | 0.22   |          |                           |        |
| 17.339   | alpha-Phellandrene          | 0.23   | 34.04    | Linalyl acetate           | 0.1    |          |                           |        |
| 17.463   | delta-3-Carene              | 0.07   | 36.767   | Thymol                    | 2.3    |          |                           |        |
| 18.008   | alpha-Terpinene             | 1.34   | 37.648   | Carvacrol                 | 64.7   |          |                           |        |
| 18.541   | para-Cymene                 | 4.96   | 38.472   | Methyl non-8-enoate       | 0.29   |          |                           |        |
| 18.801   | Limonene                    | 0.25   | 38.97    | Oregano Sesquiterpenoid 1 | 0.04   |          |                           |        |
| 18.929   | beta-Phellandrene           | 0.27   | 41.711   | Carvacryl acetate         | 0.12   |          |                           |        |
| 19.025   | 1,8-Cineole                 | 0.13   | 45.292   | beta-Caryophyllene        | 1.76   |          |                           |        |
| 19.176   | cis-beta-Ocimene            | 0.09   | 46.082   | alpha-trans-Bergamotene   | 0.04   |          |                           |        |
| 19.878   | trans-beta-Ocimene          | 0.08   | 46.46    | Aromadendrene             | 0.29   |          |                           |        |
| 20.744   | gamma-Terpinene             | 6.07   | 47.564   | alpha-Humulene            | 0.09   |          |                           |        |
| 21.563   | cis-Sabinene hydrate        | 0.23   | 49.741   | Vridiflorene              | 0.11   |          |                           |        |
| 22.544   | Terpinolene                 | 0.17   | 50.782   | beta-Bisabolene           | 2.63   |          |                           |        |
| 22.925   | para-Cymenene               | 0.07   | 51.123   | delta-Amorphene           | 0.13   |          |                           |        |

Area Total: 100

### Comments:

The analysis of this Oregano lot revealed no contaminants or adulteration.

The sample meets the expected chemical profile for authentic essential oils of *Origanum vulgare*.

© Copyright 2017 Aromatic Plant Research Center.

All rights reserved. Any publishing, copying, use, dissemination, or distribution of this report, including online, without the express written permission of Aromatic Plant Research Center is strictly prohibited.
