# Supplementary material
Source: MDPI journal article supplement (https://www.mdpi.com/2076-3417/11/4/1422)
Supplement: s1 [file s1]

Archive with 5 entries (5 files):
- Clove LOT180228.pdf
- Lemongrass LOT1916911.pdf
- Melaleuca LOT180578.pdf
- Oregano LOT180783.pdf
- Thyme LOT190219.pdf
