# Supplementary material
Source: MDPI journal article supplement (https://www.mdpi.com/2076-3417/11/4/1422)
Supplement: s1 [file s1 › Lemongrass LOT1916911.pdf]

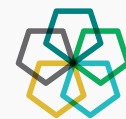

# Aromatic Plant Research Center

We provide uncompromising  
quality control for your products.

**Customer:** doTERRA International

**Lot Number:** 1916911

**Date Filled:** 6/18/2019

**Column:** ZB5 (60 m length × 0.25 mm inner diameter × 0.25 µm film thickness)

**Instrument:** Shimadzu GCMS-QP2010 Ultra

**Carrier gas:** Helium 80 psi

**Temperature ramp:** 2 degrees celsius per minute up to 260-degrees celsius

**Split ratio:** 30:1

**Sample preparation:** 5%w/v solution with Dichloromethane.

**Comments:**

The analysis of this Lemongrass lot revealed no contaminants or adulteration.

The sample meets the expected chemical profile for authentic essential oils of *Cymbopogon flexuosus*.

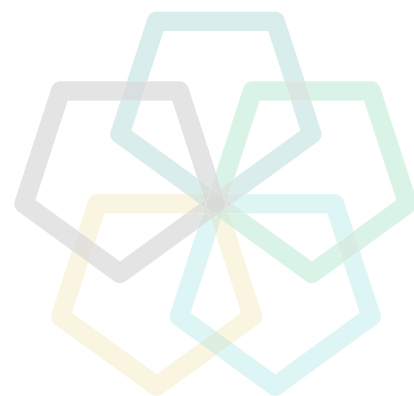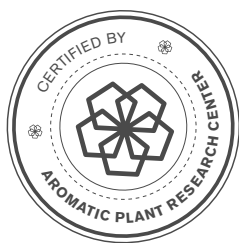

# Lemongrass Essential Oil

Customer: doTERRA International

Lot Number: 1916911

Date Filled: 6/18/2019

## Chromatogram

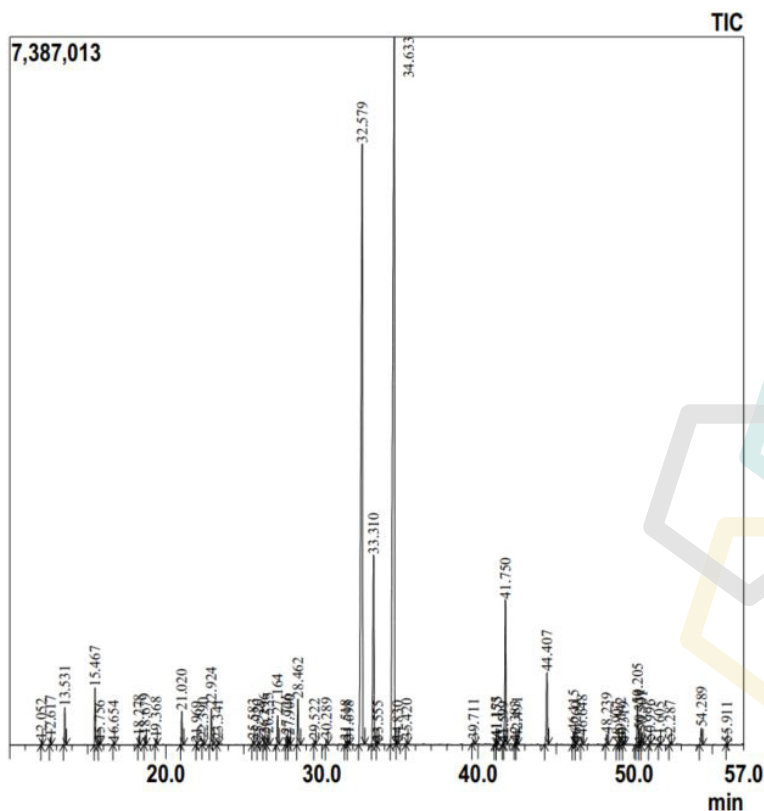

## Peak Report

| Ret.Time | Compound Name              | Area %      |     |  |  |
|----------|----------------------------|-------------|-----|--|--|
| 12.052   | Tricyclene                 | 0.1         |     |  |  |
| 12.617   | alpha-Pinene               | 0.17        |     |  |  |
| 13.531   | Camphene                   | 0.86        |     |  |  |
| 15.467   | 6-methyl-Hept-5-en-2-one   | 1.44        |     |  |  |
| 15.756   | Myrcene                    | 0.09        |     |  |  |
| 16.654   | Octanal                    | 0.05        |     |  |  |
| 18.278   | Limonene                   | 0.23        |     |  |  |
| 18.679   | cis-beta-Ocimene           | 0.25        |     |  |  |
| 19.368   | trans-beta-Ocimene         | 0.16        |     |  |  |
| 21.020   | 2-Nonanone                 | 0.9         |     |  |  |
| 21.969   | Terpinolene                | 0.03        |     |  |  |
| 22.39    | Rosefuran                  | 0.12        |     |  |  |
| 22.924   | Linalool                   | 1.09        |     |  |  |
| 23.341   | alpha-Pinene oxide         | 0.11        |     |  |  |
| 25.583   | Epiphotoxinal A            | 0.11        |     |  |  |
| 25.92    | exo-Isocitral              | 0.09        |     |  |  |
| 26.296   | trans-Chrysanthanal        | 0.27        |     |  |  |
| 26.535   | Citronellal                | 0.31        |     |  |  |
| 27.164   | cis-Isocitral              | 0.85        |     |  |  |
| 27.726   | Rosefuran epoxide          | 0.26        |     |  |  |
| 27.9     | Borneol                    | 0.23        |     |  |  |
| 28.462   | trans-Isocitral            | 1.46        |     |  |  |
| 29.522   | alpha-Terpineol            | 0.12        |     |  |  |
| 30.289   | Decanal                    | 0.18        |     |  |  |
| 31.518   | Nerol                      | 0.12        |     |  |  |
| 31.698   | Citronellol                | 0.1         |     |  |  |
| 32.579   | Neral                      | 31.01       |     |  |  |
| 33.31    | Geraniol                   | 6.78        |     |  |  |
| 33.555   | Pipitone                   | 0.07        |     |  |  |
| 34.633   | Geranial                   | 40.01       |     |  |  |
| 34.83    | 4-Undecanone               | 0.06        |     |  |  |
| 35.42    | trans-Carvone oxide        | 0.12        |     |  |  |
| 39.711   | Neriac acid                | 0.14        |     |  |  |
| 41.155   | Cyclosativene              | 0.17        |     |  |  |
| 41.173   | alpha-Ylangene             | 0.16        |     |  |  |
| 41.599   | alpha-Copaene              | 0.03        |     |  |  |
| 41.75    | Geranyl acetate            | 4.5         |     |  |  |
| 42.383   | beta-Cubebene              | 0.07        |     |  |  |
| 42.491   | beta-Elmene                | 0.2         |     |  |  |
| 44.407   | beta-Caryophyllene         | 2.51        |     |  |  |
| 46.115   | trans-Isoeugenol           | 0.41        |     |  |  |
| 46.26    | trans-Murola-3,5-diene     | 0.04        |     |  |  |
| 46.648   | alpha-Humulene             | 0.27        |     |  |  |
| 48.239   | Germacrene D               | 0.33        |     |  |  |
| 49.907   | trans-Murola-4(14),5-diene | 0.05        |     |  |  |
| 49.142   | epi-Cubebol                | 0.2         |     |  |  |
| 49.319   | alpha-Murolene             | 0.05        |     |  |  |
| 50.205   | delta-Amorphene            | 1.33        |     |  |  |
| 50.331   | Cubebol                    | 0.48        |     |  |  |
| 50.501   | delta-Cadinene             | 0.41        |     |  |  |
| 50.996   | trans-gamma-Bisabolene     | 0.08        |     |  |  |
| 51.605   | alpha-Cadinene             | 0.05        |     |  |  |
| 52.287   | alpha-Elmool               | 0.09        |     |  |  |
| 54.289   | Caryophyllene oxide        | 0.62        |     |  |  |
| 55.911   | Humulene epoxide           | 0.03        |     |  |  |
|          |                            | Area Total: | 100 |  |  |

### Comments:

The analysis of this Lemongrass lot revealed no contaminants or adulteration.

The sample meets the expected chemical profile for authentic essential oils of *Cymbopogon flexuosus*.

© Copyright 2017 Aromatic Plant Research Center.

All rights reserved. Any publishing, copying, use, dissemination, or distribution of this report, including online, without the express written permission of Aromatic Plant Research Center is strictly prohibited.
